# Supplementary material for: Choline chloride-promoted efficient solvent-free hydrogenation of biomass-derived levulinic acid to γ-valerolactone over Ru/C
Source: Royal Society of Chemistry journal article supplement (doi:10.1039/d1gc00100k), 2021-01-01
Supplement: d1gc00100k2.pdf [file d1gc00100k2.pdf]

## **Choline chloride-promoted efficient solvent-free hydrogenation of biomass-derived levulinic acid to $\gamma$ -valerolactone over Ru/C**

Huai Liu,<sup>a</sup> Xuejuan Cao,<sup>a</sup> Xing Tang,<sup>\*a,b</sup> Xianhai Zeng,<sup>a,b</sup> Yong Sun,<sup>a,b</sup> Xixian Ke,<sup>c</sup> and Lu Lin<sup>a,b</sup>

<sup>a</sup> *Xiamen Key Laboratory of Clean and High-valued Applications for Biomass, College of Energy, Xiamen University, Xiamen 361102, China.*

<sup>b</sup> *Fujian Engineering and Research Center of Clean and High-valued Technologies for Biomass, Xiamen 361102, Fujian, China.*

<sup>c</sup> *Key Lab for Sport Shoes Upper Materials of Fujian Province (Fujian Huafeng New Material Co., Ltd.), Putian 351144, Fujian, China .*

*\*Corresponding authors. E-mail addresses: [x.tang@xmu.edu.cn](mailto:x.tang@xmu.edu.cn) (X. Tang).*

## Experimental section

### Chemicals and materials

Methanol (MeOH), ethanol (EtOH), MBK, VA, acetone, methyl isobutyl ketone (MIBK), ChCl, and LiCl were purchased from Sinopharm Chemical Reagent Co. Ltd. Ru/C (5 wt%), Rh/C (5 wt%), Pd/C (5 wt%), Pt/C (5 wt%), LA (99%) and GVL (98%) were supplied by Aladdin Reagent Co. Ltd. (Shanghai, China). All the chemicals were analytical reagents and used without further purification.

### Hydrogenation of LA to GVL with the presence of ChCl

The synthetic process of the LA/ChCl was carried out in a 50 mL round-bottomed flask equipped with a magnetic stirrer. The ChCl was dried over night to remove the adsorbed H<sub>2</sub>O before use. LA and ChCl were mixed at a certain mass ratio (from 2:1 to 20:1 in this research). After heating at 80°C for 30 min, two compositions become the transparent liquid.

All the hydrogenation experiments were carried out in a 20 mL Hastelloy-C autoclave. The autoclave was charged with certain amounts of LA/ChCl and the catalyst, and then sealed and purged three times with N<sub>2</sub>, pressurized with hydrogen at ambient temperature before heating to target temperature with stirring (500 rpm). The reactor was cooled to room temperature after the reaction, and the used catalyst was recovered by centrifugation, washed by MeOH and EtOH and then dried at 60 °C for two hours. The ChCl crystal was removal after evaporation of the water. The final liquid products were analyzed by gas chromatograph-mass spectrum (GC-MS) and gas chromatograph (GC) methods.

### Products analysis

The product was detected on an Agilent 7890 series connected with a DB-Waxetr column and a flame ionization detector (FID) operating at 270 °C. The flow rate of carrier gas (N<sub>2</sub>) was 1.0 mL/min. The mass of LA or GVL in acetone solution was calculated based on a standard curve. LA conversion ( $X_{LA}$ , %), GVL selectivity ( $S_{GVL}$ , %) after reaction are calculated by the following equations:

$$X_{LA} = \left(1 - \frac{\text{mol of LA in products}}{\text{initial mol of LA}}\right) \times 100\% \quad (\text{Eq. 1})$$

$$S_{GVL} = \left(\frac{\text{mol of GVL in products}}{\text{initial mol of LA} - \text{mol of LA in products}}\right) \times 100\% \quad (\text{Eq. 2})$$

The qualitative analysis of the liquid products was carried out with a Thermofisher Trace 1300 & ISQ LT GC-MS instrument with a TR-5MS column. The operating parameters of GC-MS analysis were consistent with those of GC analysis.

Fourier transform infrared (FTIR) spectroscopy was conducted using the Nicolet Is5 spectrometer at 298 ± 2 K in the range from 4000 to 400 cm<sup>-1</sup>. Viscosity was analyzed

by a viscometer (LV model, Brookfield).

### Density functional theory (DFT) calculations

Theoretical calculations of absorb energy and charge density of LA and LA/ChCl were performed using the Vienna Ab-Initio Simulation Package (VASP) [1-3]. The projector augmented plane wave (PAW) pseudo potential basis set and generalized gradient approximation (GGA) functional by the PBE parametrization was employed in these calculations[4]. The Monkhorst-pack method with the centered k-point grid  $2 \times 2 \times 1$  was used for surface calculations. The reasonable vacuum layers were set around 15 Å in the z-direction for avoiding interaction between planes. A kinetic energy cutoff of 520 eV for the plane wave expansion is used for all systems. Geometry optimizations were pursued until the force on each atom falls below the convergence criterion of 0.02 eV/Å and energies were converged within  $10^{-5}$  eV. The charge density difference (CDD) were obtained from the charge density file (CHACAR) using VASPKIT program [5] and then rendered using VESTA visualization program[6]. The Gaussian 09 package was used to model the atomic structure of LA/ChCl combination[7]. The structure of LA/ChCl mixture was fully optimized at the PBE0/def2tzvp level[8].

The adsorption energy ( $\Delta E_{ads}$ ) of the species on slab surface was determined by the following expression [9]:

$$\Delta E_{ads} = E_{ads/base} - E_{ads} - E_{base}$$

where  $E_{ads/base}$ ,  $E_{ads}$  and  $E_{base}$  are the total energy of the adsorbed systems, the isolated HMF, and model, respectively. Accordingly, the negative  $\Delta E_{ads}$  indicates the energetically favorable (exothermic) interaction between adsorbate and slab surface.

## Results and discussion

### Screening of catalysts in the synthesis of GVL

The reaction system developed in the present study consisted of LA, ChCl, H<sub>2</sub> and Ru/C. Various noble metal catalysts were tested for the hydrogenation in this reaction system. As shown in Table S1, the catalytic results of these catalysts vary greatly. The solvent-free LA was effectively converted to GVL with 100% S<sub>GVL</sub> by only 1.75 wt % Ru/C catalyst at 150 °C (Table S1, entry 1). X<sub>LA</sub> over Rh/C was slightly inferior, but its selectivity towards GVL was acceptably good. Pd/C and Pt/C turned out to be less effective for the production of GVL from solvent-free LA feedstock (Table S1, entries 3-4).

**Table S1** LA hydrogenation in LA/ChCl over various noble catalysts

| Entry | Catalyst | X <sub>LA</sub> (%) | S <sub>GVL</sub> (%) | Y <sub>GVL</sub> (%) |
|-------|----------|---------------------|----------------------|----------------------|
|-------|----------|---------------------|----------------------|----------------------|

|   |      |      |       |      |
|---|------|------|-------|------|
| 1 | Ru/C | 80.1 | 100.0 | 80.1 |
| 2 | Rh/C | 76.2 | 98.8  | 75.3 |
| 3 | Pd/C | 23.6 | 54.9  | 13.0 |
| 4 | Pt/C | 14.4 | 62.3  | 9.0  |

Reaction conditions: 5 g LA/ChCl, 500 rpm, 1.75 wt % catalyst based on the LA, 10 h, 150 °C, 5 MPa H<sub>2</sub>, mass ratio of LA to ChCl is 10:1.

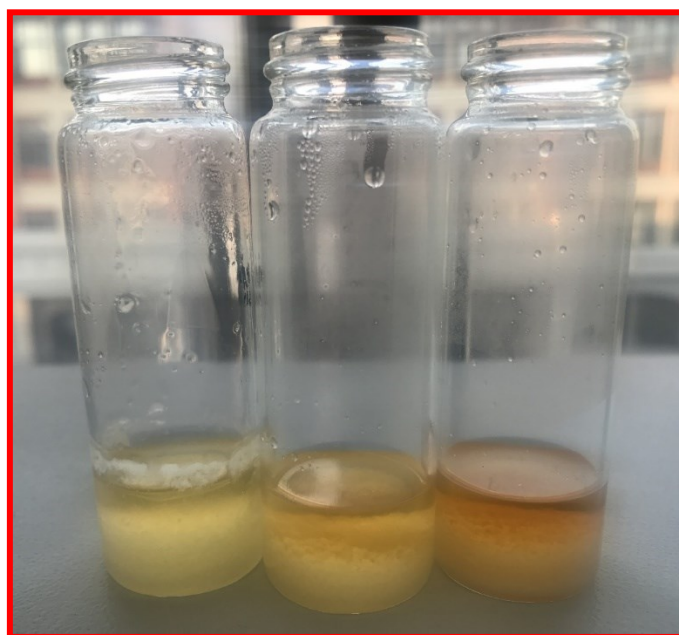

**Figure S1.** Crystallization of ChCl after reaction: recovered after 2<sup>nd</sup>, 4<sup>th</sup> and 6<sup>th</sup> run from left to right.

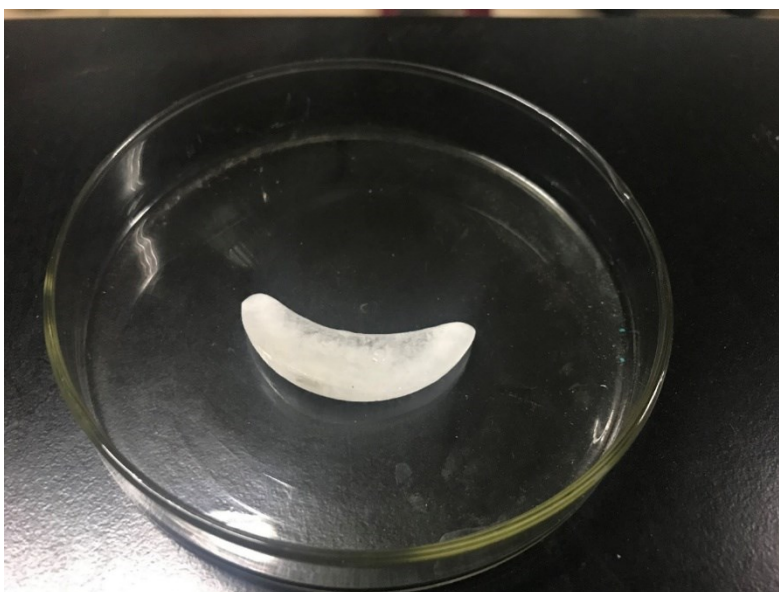

**Figure S2.** Recovered ChCl after washing and drying.

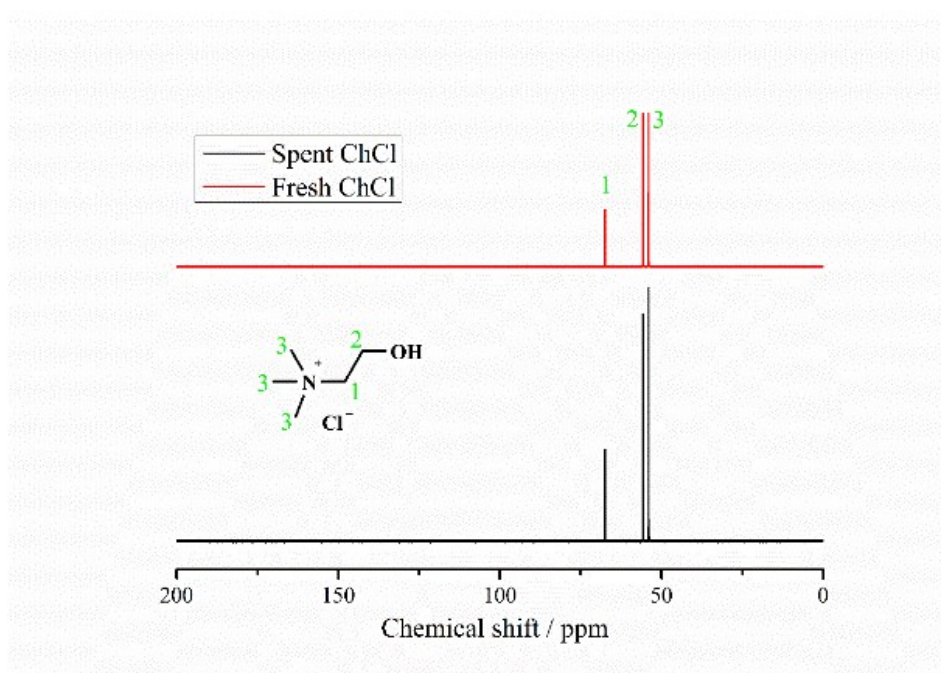

**Figure S3.** <sup>13</sup>C NMR of fresh and spent ChCl.

## Reference

- [1] P.E. Blöchl, Projector augmented-wave method, Phys Rev B, 50 (1994) 17953.
- [2] G. Kresse, J. Furthmüller, Efficient iterative schemes for ab initio total-energy calculations using a plane-wave basis set, Phys Rev B, 54 (1996) 11169.

- [3] G. Kresse, J. Furthmüller, Efficiency of ab-initio total energy calculations for metals and semiconductors using a plane-wave basis set, *Comp Mater Sci*, 6 (1996) 15-50.
- [4] M. Bajdich, M. Garcia-Mota, A. Vojvodic, J.K. Norskov, A.T. Bell, Theoretical investigation of the activity of cobalt oxides for the electrochemical oxidation of water, *J. Am. Chem. Soc.*, 135 (2013) 13521-13530.
- [5] VASPKIT: A Pre- and Post-Processing Program for VASP code, *Condensed Matter arXiv*:1908.08269.
- [6] K. Momma, F. Izumi, VESTA: a three-dimensional visualization system for electronic and structural analysis, *J Appl Crystallogr*, 41 (2008).
- [7] T.G. Frisch MJ, Schlegel HB, Scuseria GE, Robb MA, Cheeseman JR, Montgomery JA Jr, Vreven T, Kudin KN, Burant JC, Millam JM, Iyengar SS, Tomasi J, Barone V, Mennucci B, Cossi M, Scalmani G, Rega N, Petersson GA, Nakatsuji H, Hada M, Ehara M, Toyota K, Fukuda R, Hasegawa J, Ishida M, Nakajima T, Honda Y, Kitao O, Nakai H, Klene M, Li X, Knox JE, Hratchian HP, Cross JB, Bakken V, Adamo C, Jaramillo J, Gomperts R, Stratmann RE, Yazyev O, Austin AJ, Cammi R, Pomelli C, Ochterski JW, Ayala PY, Morokuma K, Voth GA, Salvador P, Dannenberg JJ, Zakrzewski VG, Dapprich S, Daniels AD, Strain MC, Farkas O, Malick DK, Rabuck AD, Raghavachari K, Foresman JB, Ortiz JV, Cui Q, Baboul AG, Clifford S, Cioslowski J, Stefanov BB, Liu G, Liashenko A, Piskorz P, Komaromi I, Martin RL, Fox DJ, Keith T, Al-Laham MA, Peng CY, Nanayakkara A, Challacombe M, Gill PMW, Johnson B, Chen W, Wong MW, Gonzalez C, Pople JA, Gaussian 03 Revision C02. Gaussian Inc Wallingford CT 2004, (2004).
- [8] C. Adamo, V. Barone, Toward reliable density functional methods without adjustable parameters: The PBE0 model, *Journal of Chemical Physics*, 110 (1999) 6158-6170.
- [9] C. Huang, Z.-Q. Wang, X.-Q. Gong, Activity and selectivity of propane oxidative dehydrogenation over VO<sub>3</sub>/CeO<sub>2</sub> (111) catalysts: A density functional theory study, *Chinese Journal of Catalysis*, 39 (2018) 1520-1526.
